# Supplementary material for: Organophosphate esters in human serum: a relatively simple and efficient liquid chromatography-mass spectrometry method
Source: Royal Society of Chemistry journal article supplement (doi:10.1039/d4ay00787e), 2024-01-01
Supplement: d4ay00787e1.pdf [file d4ay00787e1.pdf]

## Supplementary Information

for

# Organophosphate esters in human serum: A relatively simple and efficient liquid chromatography-mass spectrometry method

Zhiyuan Du <sup>a, †</sup>, Xiaoyi Wei <sup>b, †</sup>, Xiaohua Hu <sup>c, †</sup>, Yijing Zhao <sup>d</sup>, Guanghua Chen <sup>a</sup>, Xiushuai Du <sup>a</sup>, Jialing Li <sup>e, \*</sup>, Ming Zhan <sup>d, \*</sup>, Weiwei Zheng <sup>a, f, \*\*</sup>

<sup>a</sup> Key Laboratory of the Public Health Safety, Ministry of Education, Department of Environmental Health, School of Public Health, Fudan University, Shanghai 200032, PR China

<sup>b</sup> Department of food science, College of hospitality of management, Shanghai business school, Shanghai 200235, PR China

<sup>c</sup> Information Department, The First Affiliated Hospital of Naval Medical University, Shanghai 200433, PR China

<sup>d</sup> Shanghai Pudong New Area Center for Disease Control and Prevention, Fudan University Pudong Institute of Preventive Medicine, Shanghai 200136, PR China

<sup>e</sup> Health Supervision Institute of Health Commission, Songjiang District, Shanghai 201620, PR China

<sup>f</sup> Center for Water and Health, School of Public Health, Fudan University, Shanghai 200032, PR China

\* Corresponding authors.

\*\* Correspondence to: W. Zheng, Center for Water and Health, School of Public Health, Fudan University, Shanghai 200032, China.

Email address: 0157051@fudan.edu.cn (J Li), 13621876261@139.com (M. Zhan), weiweizheng@fudan.edu.cn (W. Zheng).

† These authors contribute equally to this article.

### **Text S1** Extraction of serum OPEs using liquid-liquid extraction (ethyl acetate)

First, 200  $\mu\text{L}$  of serum was placed in a glass tube, and then 10  $\mu\text{L}$  of internal standard mix (400 ng/mL), 40  $\mu\text{L}$  of formic acid, and 2 mL of ethyl acetate were added sequentially. After mixing for 1 min, the supernatant was shaken with a shaker at 300 r/min for 10 min and then centrifuged at 6000 rpm for 10 min. The supernatant was transferred to a new glass tube, the extracts were dried under a gentle nitrogen stream at 40°C (the nitrogen flow rate should not be too large, enabling slight fluctuations of the liquid level). 200  $\mu\text{L}$  of aqueous acetonitrile (50:50, V:V) was added to the dried sample, which was then redissolved by ultrasonication for 5 min. Finally, the mixture was filtered through a 0.22  $\mu\text{m}$  nylon needle filter into an injection vial for analysis.

### **Text S2** Procedure of solid phase extraction

**Strata<sup>TM</sup>-X-AW column:** First, 200  $\mu\text{L}$  of serum was added to the glass tube, then 10  $\mu\text{L}$  of internal standard mix (400 ng/mL) was added and vortexed for 1 min to mix and set aside for use. The StrataX-AW column was firstly activated with 2 ml of acetonitrile and 2 ml of water. Then serum was added to the column, and the serum was allowed to pass through the column as slowly as possible. Then the column was rinsed with 2 mL of ultrapure water and vacuum pumped for 40 min. 4 mL of 5% triethylamine-acetonitrile was used for elution and the eluate was collected. The eluate was dried under a gentle nitrogen stream at 40°C (the nitrogen flow rate should not be too large, enabling slight fluctuations of the liquid level). 200  $\mu\text{L}$  of aqueous acetonitrile (50:50, V:V) was added to the dried sample, which was then redissolved by ultrasonication for 5 min. Finally, the mixture was filtered through a 0.22  $\mu\text{m}$  nylon needle filter into an injection vial for analysis.

**Supelclean<sup>TM</sup> ENVI-18 column:** First, 200  $\mu\text{L}$  of serum was added to the glass tube, then 10  $\mu\text{L}$  of internal standard mix (400 ng/mL) was added and vortexed for 1 min to mix and set aside for use. The ENVI-18 column was activated sequentially with 5 mL of acetonitrile and 5 mL of ultrapure water. Then serum was added to the column, and the serum was allowed to pass through the column as slowly as possible. Then the column was rinsed with 10 mL of ultrapure water and vacuum pumped for 60 min. 6 mL of acetonitrile containing 25% dichloromethane was used for elution and the eluate was collected. The eluate was dried under a gentle nitrogen stream at 40°C (the nitrogen flow rate should not be too large, enabling slight fluctuations of the liquid level). 200

$\mu\text{L}$  of aqueous acetonitrile (50:50, V:V) was added to the dried sample, which was then redissolved by ultrasonication for 5 min. Finally, the mixture was filtered through a 0.22  $\mu\text{m}$  nylon needle filter into an injection vial for analysis.

**Oasis HLB column:** First, 200  $\mu\text{L}$  of serum was added to the glass tube, then 10  $\mu\text{L}$  of internal standard mix (400 ng/mL) was added and vortexed for 1 min to mix and set aside for use. The HLB column was activated by 5 mL acetonitrile, 5 mL methanol and 10 mL ultrapure water. Then serum was added to the column, and the serum was allowed to pass through the column as slowly as possible. Then the column was rinsed with 10 mL of ultrapure water and vacuum pumped for 60 min. 10 mL of acetonitrile was used for elution and the eluate was collected. The eluate was dried under a gentle nitrogen stream at 40°C (the nitrogen flow rate should not be too large, enabling slight fluctuations of the liquid level). 200  $\mu\text{L}$  of aqueous acetonitrile (50:50, V:V) was added to the dried sample, which was then redissolved by ultrasonication for 5 min. Finally, the mixture was filtered through a 0.22  $\mu\text{m}$  nylon needle filter into an injection vial for analysis.

**Sep-Pak C18 column:** Consistent with the procedure of the HLB column.

**Table S1** Full name, abbreviation, CAS number, molecular formula, and molecular weight of nine OPEs

| Compounds                            | Abbreviation      | CAS NO.    | Formula                                                         | Molecular weight |
|--------------------------------------|-------------------|------------|-----------------------------------------------------------------|------------------|
| Tri-ethyl-phosphate                  | TEP               | 78-40-0    | C <sub>6</sub> H <sub>15</sub> O <sub>4</sub> P                 | 182.15           |
| Tri-n-butyl-phosphate                | TBP               | 126-73-8   | C <sub>12</sub> H <sub>27</sub> O <sub>4</sub> P                | 266.31           |
| Tris-2-butoxy ethyl-phosphate        | TBEP/TBOEP        | 78-51-3    | C <sub>18</sub> H <sub>39</sub> O <sub>7</sub> P                | 398.47           |
| Tri-propyl-phosphate                 | TPrP              | 513-08-6   | C <sub>9</sub> H <sub>21</sub> O <sub>4</sub> P                 | 224.23           |
| Tris-2-chloroethyl-phosphate         | TCEP              | 115-96-8   | C <sub>6</sub> H <sub>12</sub> Cl <sub>3</sub> O <sub>4</sub> P | 285.49           |
| Tris-chloropropyl-phosphate          | TCPP/TCIPP        | 1067-98-7  | C <sub>9</sub> H <sub>18</sub> Cl <sub>3</sub> O <sub>4</sub> P | 327.57           |
| Tris-1,3-dichloro-2-propyl-phosphate | TDCP/TDCPP/TDCIPP | 13674-87-8 | C <sub>9</sub> H <sub>15</sub> Cl <sub>6</sub> O <sub>4</sub> P | 430.91           |
| Tris-2,3-dibromo propyl-phosphate    | TDBP/TDBPP        | 126-72-7   | C <sub>9</sub> H <sub>15</sub> Br <sub>6</sub> O <sub>4</sub> P | 697.61           |
| Tri-phenyl phosphate                 | TPhP/TPHP         | 115-86-6   | C <sub>18</sub> H <sub>15</sub> O <sub>4</sub> P                | 326.28           |

**Table S2** The gradient elution conditions of OPEs

| Time<br>(min) | Flow Rate<br>(mL/min) | Mobile Phase A <sup>a</sup><br>(%) | Mobile Phase B <sup>b</sup><br>(%) |
|---------------|-----------------------|------------------------------------|------------------------------------|
| 0.00          | 0.25                  | 80.0                               | 20.0                               |
| 1.00          | 0.25                  | 80.0                               | 20.0                               |
| 3.00          | 0.25                  | 10.0                               | 90.0                               |
| 6.00          | 0.25                  | 10.0                               | 90.0                               |
| 6.10          | 0.25                  | 80.0                               | 20.0                               |
| 9.00          | 0.25                  | 80.0                               | 20.0                               |

<sup>a</sup>: Ultrapure water with 0.1% formic acid;

<sup>b</sup>: Acetonitrile.

**Table S3** Retention time and exact mass number of OPEs in MS mode

| Compound | Mean t <sub>R</sub> | Theoretical Mass(Da) | Experimental Mass(Da) | Mass error (mDa) | Adducts |
|----------|---------------------|----------------------|-----------------------|------------------|---------|
| TEP      | 4.13                | 182.07080            | 182.0704              | -0.4             | +H      |
| TBP      | 5.70                | 266.16470            | 266.1644              | -0.3             | +Na, +H |
| TBEP     | 5.83                | 398.24334            | 398.2425              | -0.9             | +H      |
| TPrP     | 5.01                | 224.11775            | 224.1173              | -0.5             | +Na, +H |
| TCEP     | 4.63                | 283.95388            | 283.9537              | -0.2             | +H      |
| TCIPP    | 5.02                | 326.00083            | 326.0022              | 1.4              | +H, +Na |
| TDCPP    | 5.40                | 427.88391            | 427.8841              | 0.2              | +H      |
| TDBPP    | 5.53                | 697.57480            | 697.5744              | -0.4             | +H      |
| TPhP     | 5.55                | 326.07080            | 326.0702              | -0.6             | +H, +Na |

**Table S4** Chromatographic and mass spectrometric characteristics of the analytes.

| Compound  | RT (min) <sup>a</sup> | Precursor (m/z) | CV(V) <sup>b</sup> | Product (m/z)         | CE (V) <sup>c</sup> |
|-----------|-----------------------|-----------------|--------------------|-----------------------|---------------------|
| TEP       | 4.13                  | 183.0791        | 10                 | 98.9854 <sup>d</sup>  | 10                  |
|           |                       |                 |                    | 127.0232 <sup>e</sup> | 5                   |
| TBP       | 5.70                  | 267.1745        | 10                 | 98.9874 <sup>d</sup>  | 15                  |
|           |                       |                 |                    | 155.0511 <sup>e</sup> | 10                  |
| TBEP      | 5.83                  | 400.2721        | 30                 | 300.1802 <sup>d</sup> | 15                  |
|           |                       |                 |                    | 199.0850 <sup>e</sup> | 25                  |
| TPrP      | 5.01                  | 225.1256        | 10                 | 98.9854 <sup>d</sup>  | 15                  |
|           |                       |                 |                    | 141.0363 <sup>e</sup> | 10                  |
| TCEP      | 4.63                  | 284.9617        | 20                 | 98.9854 <sup>d</sup>  | 25                  |
|           |                       |                 |                    | 160.9815 <sup>e</sup> | 15                  |
| TCIPP     | 5.02                  | 327.0068        | 30                 | 98.9874 <sup>d</sup>  | 20                  |
|           |                       |                 |                    | 174.9934 <sup>e</sup> | 15                  |
| TDCPP     | 5.40                  | 430.8889        | 20                 | 98.9854 <sup>d</sup>  | 30                  |
|           |                       |                 |                    | 208.9561 <sup>e</sup> | 15                  |
| TDBPP     | 5.53                  | 698.5813        | 20                 | 98.9854 <sup>d</sup>  | 25                  |
|           |                       |                 |                    | 498.7246 <sup>e</sup> | 15                  |
| TPhP      | 5.55                  | 327.0821        | 30                 | 215.0270 <sup>d</sup> | 25                  |
|           |                       |                 |                    | 152.0613 <sup>e</sup> | 30                  |
| TCEP-d12  | 4.62                  | 296.0478        | 20                 | 167.0162 <sup>d</sup> | 15                  |
|           |                       |                 |                    | 102.0050 <sup>e</sup> | 20                  |
| TCIPP-d18 | 5.00                  | 344.1421        | 30                 | 102.0046 <sup>d</sup> | 25                  |
|           |                       |                 |                    | 183.0433 <sup>e</sup> | 10                  |
| TPrP-d21  | 4.98                  | 245.2824        | 10                 | 102.0067 <sup>d</sup> | 20                  |
|           |                       |                 |                    | 150.0901 <sup>e</sup> | 10                  |
| TBP-d27   | 5.67                  | 294.3542        | 20                 | 102.0067 <sup>d</sup> | 15                  |
|           |                       |                 |                    | 230.2316 <sup>e</sup> | 10                  |
| TPhP-d15  | 5.52                  | 342.1717        | 20                 | 223.0790 <sup>d</sup> | 25                  |
|           |                       |                 |                    | 161.1215 <sup>e</sup> | 15                  |

<sup>a</sup>: Retention time

<sup>b</sup>: Cone voltage

<sup>c</sup>: Collision energy

<sup>d</sup>: Quantitative ion

<sup>e</sup>: Qualitative ion

**Table S5** ME of the target OPEs (n=6)

| Analyte   | ME (%) | Internal standards | MEi (%) |
|-----------|--------|--------------------|---------|
| TEP       | 43.5   | TPrP-d21           | 82.7    |
| TBP       | 38.0   | TBP-d27            | 86.3    |
| TBEP      | 36.9   | TBP-d27            | 83.9    |
| TPrP      | 53.2   | TPrP-d21           | 101.0   |
| TCEP      | 65.1   | TCEP-d12           | 113.1   |
| TCIPP     | 59.3   | TCIPP-d18          | 86.4    |
| TDBPP     | 47.3   | TPhP-d15           | 99.6    |
| TDCPP     | 54.1   | TPhP-d15           | 113.9   |
| TPhP      | 41.1   | TPhP-d15           | 86.5    |
| TBP-d27   | 44.0   | /                  | /       |
| TCEP-d12  | 57.6   | /                  | /       |
| TPrP-d21  | 52.6   | /                  | /       |
| TCIPP-d18 | 68.6   | /                  | /       |
| TPhP-d15  | 47.5   | /                  | /       |

**Table S6** Concentrations of OPEs (ng/mL) in serum samples<sup>a</sup> (N=269)

| Chemicals | Detection frequency (%) | 5th               | 25th              | 50th | 75th  | 95th  | Rang        | Trimmean±Std <sup>b</sup> |
|-----------|-------------------------|-------------------|-------------------|------|-------|-------|-------------|---------------------------|
| TBP       | 53                      | <MDL <sup>c</sup> | <MDL              | 0.04 | 4.18  | 19.28 | <MDL~68.00  | 1.69±2.91                 |
| TEP       | 32                      | <MDL              | <MDL              | <MDL | 0.14  | 1.23  | <MDL~21.16  | 0.08±0.10                 |
| TBEP      | 73                      | <MDL              | <MDL              | 0.06 | 0.17  | 0.86  | <MDL~10.43  | 0.10±0.09                 |
| TPrP      | 88                      | <MDL              | <MDL              | 0.36 | 0.46  | 0.62  | <MDL~0.80   | 0.31±0.17                 |
| TCEP      | 76                      | <MDL              | 0.07              | 0.15 | 0.75  | 2.50  | <MDL~9.71   | 0.33±0.35                 |
| TCIPP     | 60                      | <MDL              | <MDL              | 1.31 | 3.64  | 8.74  | <MDL~455.60 | 1.71±1.82                 |
| TDCPP     | 83                      | <MDL              | <MQL <sup>d</sup> | 1.23 | 3.30  | 12.52 | <MDL~106.80 | 1.77±1.87                 |
| TDBPP     | 85                      | <MDL              | 0.14              | 0.37 | 0.80  | 2.0   | <MDL~52.15  | 0.46±0.37                 |
| TPhP      | 66                      | <MDL              | <MDL              | 0.15 | 0.85  | 6.96  | <MDL~385.80 | 0.48±0.66                 |
| ΣOPFRs    | 100                     | 3.41              | 5.84              | 9.68 | 14.47 | 54.18 | 0.79~552.26 | 10.50±4.88                |

<sup>a</sup>: Reported values were calculated by subtracting the average blank value from the initial concentration.

<sup>b</sup>: The trimmed mean was calculated by removing 10% of the data from both ends to calculate the average value.

<sup>c</sup>: Below the method, the detection limit was defined as not detected and was not included in the calculation of the detection frequency. Values below the method detection limit were used in the statistical calculation at 1/2 the detection limit.

<sup>d</sup>: Range from the MDL to MQL. Values below the method quantification limit were used in the statistical calculation at 1/2 the detection limit.

**Table S7** Detection of blood OPEs in populations by regions

| Area      | Type               | Samples     | Median concentration(min~max,detection frequency) |                        |                                |                        |                       |                            |                       |       | Reference             |      |
|-----------|--------------------|-------------|---------------------------------------------------|------------------------|--------------------------------|------------------------|-----------------------|----------------------------|-----------------------|-------|-----------------------|------|
|           |                    |             | TBP                                               | TEP                    | TBEP                           | TPrP                   | TCEP                  | TCIPP                      | TDCPP                 | TDBPP |                       | TPhP |
| Beijing   | Whole blood        | 57(ng/ml)   | / <sup>a</sup>                                    | 0.43(0.146-9.88,100%)  | 0.16(n.d. <sup>b</sup> -19.5%) | n.d.(n.d.-0.126,11%)   | n.d.( n.d.-1.80,14%)  | n.d.(n.d.-15.2,49%)        | n.d.(n.d.-6.06,25%)   | /     | 0.366(n.d.-7.80,65%)  | 1    |
|           | Serum              | 57(ng/ml)   | /                                                 | 0.432(0.081-12.3, 74%) | 0.21(n.d.-0.976,84%)           | n.d.(n.d.-0.025,16%)   | n.d.(n.d.-1.66,18%)   | 1.05(0.166-5.24,82%)       | n.d.(n.d.-5.16,26%)   | /     | n.d.(n.d.-0.692, 32%) |      |
| Tianjin   | Serum              | 319(ng/ml)  | /                                                 | 1.52(n.d.-9.63,62.1%)  | 1.44(n.d.-2.72,9.09%)          | /                      | 0.33(n.d.-2.89,96.6%) | 3.19(n.d.-30.3,75.2&)      | 0.16(n.d.-1.97,79.3%) | /     | /                     | 2    |
| Shangdong | Whole blood        | 352(ng/ml)  | /                                                 | 0.14(n.d.-18.4,54%)    | n.d.(n.d.-6.17,41%)            | n.d.(n.d.-0.250 ,0.9%) | 0.30(n.d.-5.06,56%)   | 0.74./0.508(n.d.-4.45,77%) | n.d.(n.d.-2.57,34%)   | /     | 0.40(n.d.-7.52,78%)   | 3    |
| Shangdong | Serum <sup>c</sup> | 239(ng/ml)  | 108(50%)                                          | /                      | n.d. (39%)                     | n.d. (28%)             | 18(74%)               | n.d. (18%)                 | n.d. (49%)            | /     | /                     | 4    |
| Jiangsu   | Serum/Plasma       | 99(ng/ml)   | /                                                 | 0.15(n.d.-2.8,79%)     | 0.05(n.d.-14.4,51%)            | /                      | 0.1(n.d.-3.1,66%)     | 0.05(n.d.-7.0,57%)         | n.d.(n.d.-1.4,24%)    | /     | 0.35(n.d.-14.4,80%)   | 5    |
| Shenzhen  | Whole blood        | 257(ng/ml)  | /                                                 | 0.49(n.d.-4.59,96.1%)  | 0.54(n.d.-16.0,98.1%)          | /                      | 0.16(n.d.-2438,63.0%) | 0.71(n.d.-21.61,90.3%)     | 0.01(n.d.-3.41,47.1%) | /     | 0.43(n.d.-1.21,98.4%) | 6    |
| Dalian    | Serum              | 89(ng/g lw) | /                                                 | /                      | /                              | 9(n.d-65.3, 83.2%)     | 214(n.d.-894,76.4%)   | 0.61(n.d.-31.5,4.5%)       | /                     | /     | 0.51(n.d.-92.6,36%)   | 7    |
| Zhejiang  | Serum              | 145(ng/ml)  | 0.27(n.d.-1.54,88%)                               | 1.18(n.d.-9.84,95%)    | 0.034(n.d.-0.39,63%)           | /                      | 0.45(n.d.-2.4,95%)    | 0.49(n.d.-1.72,93%)        | 0.027(n.d.-0.85,62%)  | /     | 0.18(n.d.-2.06,80%)   | 8    |
| Zhejiang  | plasma             | 96(ng/ml)   | 0.87(n.d.-2.85,97%)                               | /                      | 0.28(n.d.-3.45,95%)            | /                      | 0.87(n.d.-2.79,88%)   | 0.494(n.d.-2.94,64%)       | n.d.(0%)              | /     | 1.83(n.d.-6.582,98%)  | 9    |

<sup>a</sup>: The substance was not addressed in the study;

<sup>b</sup>: Not detected;

<sup>c</sup>: Concentration range values for OPFRs were not provided in this study.

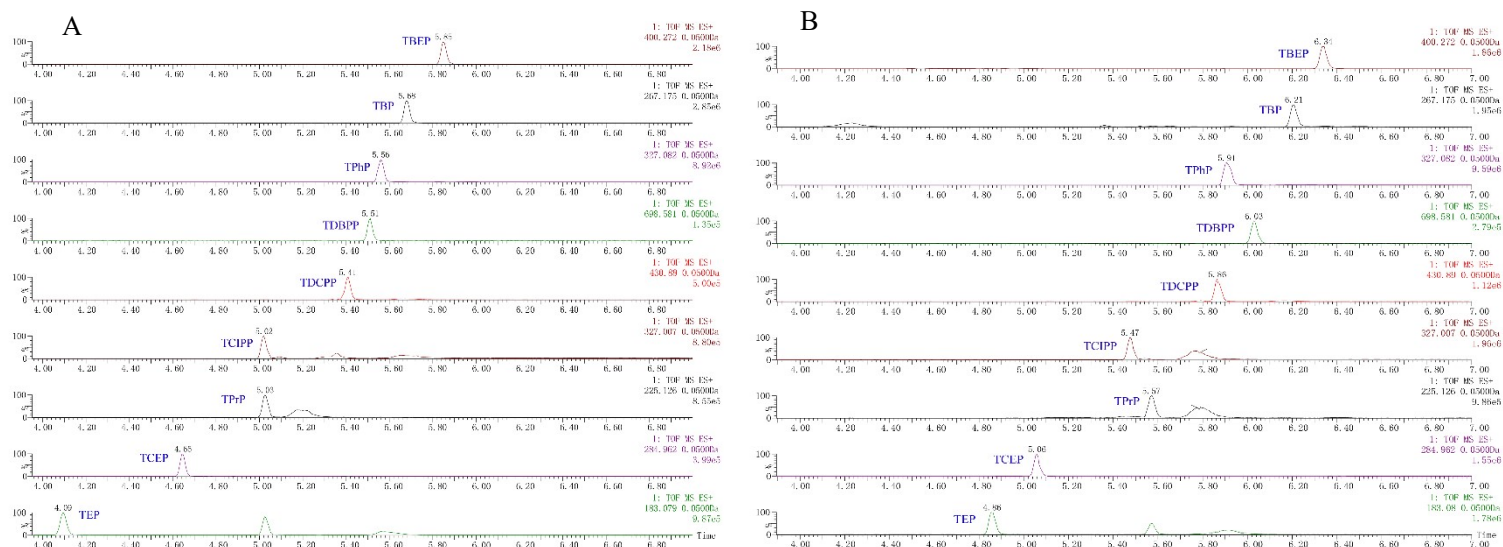

**Fig. S1** Comparison of mobile phase types on peak shape and separation of OPEs. (A) The organic phase is acetonitrile; (B) The organic phase is methanol; The concentration of OPEs is 20ng/mL in the figures.

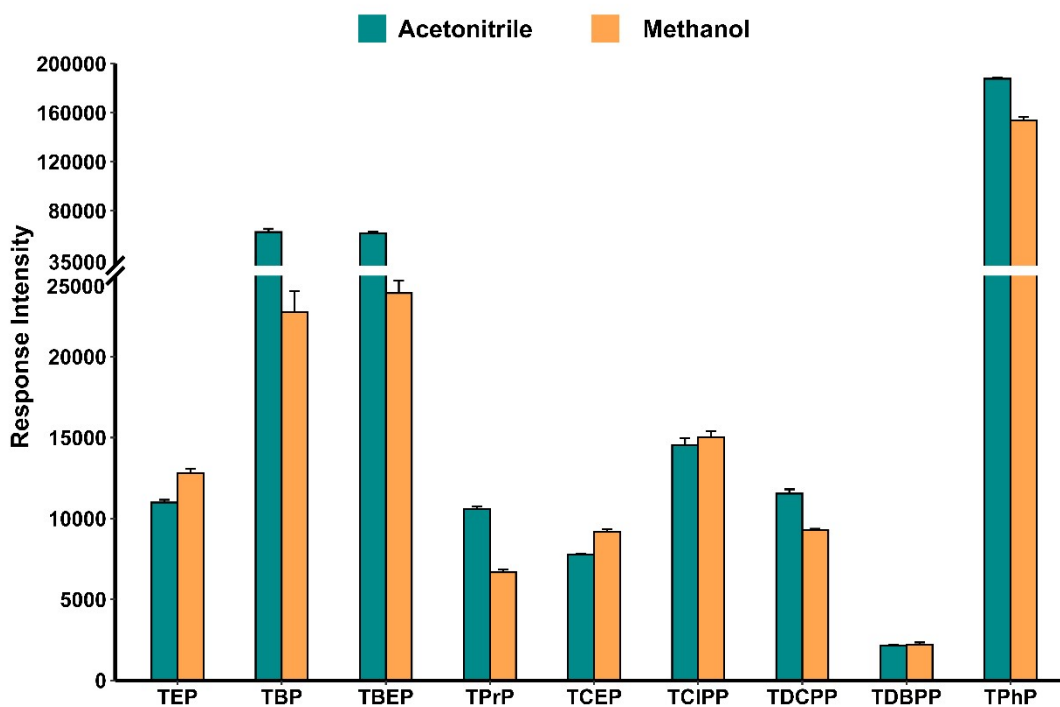

**Fig. S2** Effect of mobile phase type on the response strength of OPEs. The concentration of OPEs is 20ng/mL in the figure.



## References

- 1 M. Hou, Y. Shi, Q. Jin and Y. Cai, *Environ Int*, 2020, **139**, 105698.
- 2 Y. Liu, Y. Li, N. Xiao, M. Liu, Y. Wang, H. Luo, Y. Yao, Y. Feng and S. Wang, *Chemosphere*, 2023, **337**, 139237.
- 3 M. Hou, J. Fang, Y. Shi, S. Tang, H. Dong, Y. Liu, F. Deng, J. P. Giesy, K. J. Godri Pollitt, Y. Cai and X. Shi, *Environ Int*, 2021, **157**, 106803.
- 4 M. Liu, A. Li, L. Meng, G. Zhang, X. Guan, J. Zhu, Y. Li, Q. Zhang and G. Jiang, *Environ Sci Technol*, 2022, **56**, 17825–17835.
- 5 M. Ya, N. Yu, Y. Zhang, H. Su, S. Tang and G. Su, *Environ Int*, 2019, **131**, 105056.
- 6 F. Zhao, Y. Wan, H. Zhao, W. Hu, D. Mu, T. F. Webster and J. Hu, *Environ Sci Technol*, 2016, **50**, 8896–8903.
- 7 D. Gao, J. Yang, T. G. Bekele, S. Zhao, H. Zhao, J. Li, M. Wang and H. Zhao, *Environ Sci Pollut R*, 2020, **27**, 2721–2729.
- 8 K. Liao, Y. Zhao, J. Qu, W. Yu, S. Hu, S. Fang, M. Zhao and H. Jin, *Environ Pollut*, 2023, **331**, 121941.
- 9 Q. Zhang, M. Chu, S. Lin, J. Lou and C. Wang, *Environ Res*, 2023, **216**, 114704.
